# Supplementary material
Source: PubMed Central journal article supplement (PMC4013874)

## Supplemental Materials and Methods

### *Proteomic analysis*

Sperm from the caudae epididymides of C57BL/6 mice were collected in PBS containing complete protease inhibitor cocktail (Roche Applied Sciences; Indianapolis, IN), and washed two times at 500 g for 5 min at 4°C. Sperm pellets were collected by centrifugation at 13,700 g for 15 min at 4°C, lysed in 1% Triton X-100 buffer (TX) (50 mM Tris-HCl, (pH 9.0), 1 mM EDTA, 1 mM EGTA, 2mM phenylmethylsulfonyl fluoride (PMSF), 2 mM DTT, one tablet of EDTA-free complete proteinase inhibitor cocktail (Roche Applied Sciences)] or 80 mM n-Octyl-β-D-glucopyranoside buffer (NOG) (10 mM Tris-HCl (pH 7.2), one tablet of complete protease inhibitor cocktail (Roche Applied Sciences)], and incubated for 2 h at 4°C. The sperm solutions were centrifuged at 13,700 g for 15 min at 4°C, and the supernatants were used as samples.

Sperm lysate samples (100 µg) from *Akap4*<sup>-/-</sup> (Miki et al., 2004) and WT mice were added to 200 µl of DeStreak rehydration solution and loaded on 11-cm Immobiline DryStrip (GE Healthcare Life Sciences, Piscataway NJ), pH3-11NL with IPG buffer pH3-11NL. The first dimension-isoelectric focusing (IEF) was run by IPGphor Isoelectric Focusing System (GE Healthcare Life Sciences) overnight, and the samples were resolved by rehydration for 12 h, at 500 volts/h for 1 h, at 1000 volts/h for 1 h, and at 16,000 volts/h for 2 h. The IPG sample strips were equilibrated twice for 15 min at room temperature (RT) in SDS equilibration buffer (50 mM Tris-Cl, (pH 8.8), 6 M urea, 30 % glycerol (v/v), 2 % SDS, bromophenol blue) containing freshly added 1 % DTT, followed by equilibration in the buffer containing 2.5 % iodoacetamide for 15 min at RT. The equilibrated IPG strips were placed on 8-16 % Criterion Tris-HCl precast gels (Bio-Rad, Hercules, CA), and subjected to second dimensional electrophoresis. After running, gels were fixed and stained overnight using SYPRO Ruby Protein Stains (Life Technologies

Corp., Carlsbad, CA) according to the supplier's directions. The experiments were performed in triplicate.

Gel images were captured (Fluor-S Multimager, Bio-Rad) for analysis and comparison using Image J and PDQuest software. Differentially expressed proteins with 1.5 fold changes in the density level of the spot (Supplemental Fig. S1) were excised manually from gels, digested with trypsin (Promega, Madison, WI) for 8 hour in a Progest In-gel Digester (Genomics Solutions, Bath, UK), and analyzed by MALDI mass spectrometry (MALDI/MS). Samples were lyophilized to dryness and resuspended in 50:50 (v/v) 0.2 % formic acid:acetonitrile, and then 0.3  $\mu$ l samples were spotted onto a 192-sample stainless steel MALDI plate and mixed with 0.3  $\mu$ l of 33 % saturated  $\alpha$ -cyano-hydroxycinnamic acid. Mass spectrometric analyses were performed with an AB 4700 Proteomics Analyzer (Life Technologies) in the positive ion and reflector modes. The MS was internally calibrated using autolytic tryptic peptides and the MS/MS calibrated externally using the fragment ions of the angiotensin I M+H ion ( $m/z$  1296.68). A focus mass of  $m/z$  2000 was used for the MS acquisition. For the MS/MS, 1000 volts were used for the collision energy and argon used as the collision gas with a recharge threshold set at  $1.0 \times 10^{-7}$  torr. Protein identification was performed by interrogating both the MS and the MS/MS using MASCOT and the entire NCBI non-redundant database. Search parameters included an allowance of two missed tryptic cleavages, a 0.06 Da mass tolerance for the MS data, a 0.1 Da mass tolerance for the MS/MS data, and an allowance for variable oxidation of methionine residues.

**Supplemental Table S1: PCR Primer Sequences**

| MGI<br>Gene name                                | Chromosome<br>(strand; location) | Primer Name<br>(Amplified Region)                                | Primer<br>(upper: forward; lower: reverse)                                    | Amplified size<br>(bp) | Primer position<br>(upper: forward;<br>lower: reverse) |
|-------------------------------------------------|----------------------------------|------------------------------------------------------------------|-------------------------------------------------------------------------------|------------------------|--------------------------------------------------------|
| <i>Eno1</i><br>(Enolase 1, alpha<br>non-neuron) | 4 (+; 149610830-149622988)       | <i>Eno1</i><br>(5'UTR+ORF)                                       | 5'- GTG GGA GGC GCT TAG TGC TGC -3'<br>5'- GAG GCA GCC ACA TCC ATG CCAA -3'   | 869                    | 31-51<br>898-878                                       |
| <i>Gm5506</i><br>(Predicted gene<br>5506)       | 18 (+; 48204989-48208032)        | <i>Gm5506_v1</i><br>(5'UTR+ORF)                                  | 5'- GAA GGT GTG GCT GTT TAT TTT AC -3'<br>5'- CAC CGC AGC TCG GAA GAG ACC -3' | 264                    | 1-23<br>261-241                                        |
| <i>Eno4</i><br>(Enolase 4)                      | 19 (+; 59017915-59045909)        | <i>Eno4-5'ORF</i><br>(ORF)                                       | 5'- GAG AAC GAC GTC CCG CGC AA -3'<br>5'- TGG TGG AGG TGC GGG AAC CA -3'      | 489                    | 117-136<br>605-586                                     |
|                                                 |                                  | <i>Eno4-3'ORF</i><br>(ORF)                                       | 5'- AGC ATG GCC ATA GGC GCT GT -3'<br>5'- AGC TGC GCT TTT GTG GGT GC -3'      | 561                    | 741-760<br>1301-1282                                   |
|                                                 |                                  | <i>Eno4-3'UTR</i><br>(3'UTR)                                     | 5'- AGG GCA CAG CCA CTC CAC CA -3'<br>5'- GGT GCG TGA CTG GGC GTG AA -3'      | 297                    | 1915-1934<br>2211-2192                                 |
|                                                 |                                  | <i>Eno4-full length</i><br>(ORF+3'UTR)                           | 5'- GTC CCG CGC AAG CTG GAA GAT -3'<br>5'- TCC AGA ACC GGG AGG GAG GC -3'     | 1784                   | 126-146<br>1909-1890                                   |
|                                                 |                                  | <i>Eno4-3'ORF-ex13</i><br>(ORF including exon 13<br>nucleotides) | 5'- CCG CTT CCG GGA GTG TCT CT -3'<br>5'- GCC CTG GGA GTC CAG AAC CG -3'      | 476                    | 1444-1463<br>1919-1900                                 |
| <i>Rn18S</i>                                    |                                  | <i>Rn18S</i>                                                     | 5'- GAC CCG GGG AGG TAG TGA CGA-3'<br>5'- GGA GCT GGA ATT ACC GCG GCT-3'      | 141                    |                                                        |

NCBI Reference sequences: *Eno4*: NM\_178689.4; *Eno1*: NM\_023119.2; *Gm5506*: see Supplemental Fig. S4  
ORF positions of each gene: *Eno4*: 33-1889; *Eno1*: 154-1458

## Supplemental Table S2. qPCR Primer Sequences

| Primer Name<br>(Region)        | Primer<br>(upper: forward; lower: reverse) | Amplified size<br>(bp) | Primer<br>Position* |
|--------------------------------|--------------------------------------------|------------------------|---------------------|
| <i>Eno4</i> -5'                | 5'- ATG GGA GAT GAA GAC GGC GG-3'          | 146                    | 33-52               |
| ( <i>Eno4</i> -5'ORF region)   | 5'- GCA GGC TGG AGG TAG AAG GT-3'          |                        | 178-159             |
| <i>Eno4</i> -3'ORF (exon13)    | 5'- GGT GCC CGG TTT ATC AAG TT -3'         | 105                    | 1656-1675           |
| ( <i>Eno4</i> -exon13 region ) | 5'- CCA TAC TCC CCT CTG GAT GA -3'         |                        | 1760-1741           |
| <i>Gapdh</i>                   | 5'- TGC ACC ACC AAC TGC TTA G-3'           | 176                    |                     |
|                                | 5'- GAT GCA GGG ATG ATG TTC-3'             |                        |                     |

\*NCBI Reference sequences: *Eno4*: NM\_178689.4

**Supplemental Table S3. Sperm Motility**

|                                       | % motility |             |             | % progress motility    |            |            |
|---------------------------------------|------------|-------------|-------------|------------------------|------------|------------|
|                                       | 5 min      | 60 min      | 120 min     | 5 min                  | 60 min     | 120 min    |
| <i>Eno4</i> <sup>+/+</sup><br>(n=2)   | 45.6 ± 8.2 | 48.2 ± 10.1 | 37.4 ± 16.9 | 26.8 ± 3.0             | 24.4 ± 4.4 | 17.3 ± 8.0 |
| <i>Eno4</i> <sup>Gt/Gt</sup><br>(n=2) | 15.2 ± 2.9 | 8.0 ± 2.5   | 1.9 ± 0.2   | 5.7 ± 1.8 <sup>1</sup> | 2.5 ± 1.6  | 1.1 ± 0.3  |

<sup>1</sup> p < 0.05 compared to *Eno4*<sup>+/+</sup>

## SUPPLEMENTAL FIGURE LEGENDS

**Supplemental Fig. S1.** Two-dimensional gel analysis of NOG extract of WT C57BL/6 sperm. The samples were prepared and analyzed as described in Supplemental Methods and Materials. The gel was silver stained and the proteins in the white box were determined by MS/MS analysis to be enolase 4 (ENO4).

**Supplemental Fig. S2.** Western blotting of kidney, brain, skeletal muscle, testis and sperm, using pan-enolase antibody (ENO) and antibodies to ENO2 and ENO3. Pan-enolase antibody detected a band in all tissues, while antibodies to ENO2 and ENO3 detected a band in brain and skeletal muscle, respectively, but not in sperm. The CBB stained gel for the ENO western blot is shown as a loading control.

**Supplemental Fig. S3.** Alignment of mouse ENO1, ENO2, ENO3 and ENO4 amino acid sequences. Gaps are show as (-), identities are show as (\*), similarities are shown as (:).

**Supplemental Fig. S4.** Alignment of *Eno4*, *Eno4\_v1* and *Eno4\_v2* nucleotides and their deduced amino acid sequences. **A)** The underlined ATG in bold in the nucleotide sequences identifies the predicted initiation codons. Gaps are show as (-). **B)** The initiation methionine (**M**) of ENO4 and ENO4\_V1 protein sequences is underlined. The predicted initiation methionine (**M**) of ENO4\_V2 is shown in bold.

**Supplemental Fig. S5.** Alignment of *Gm5506* and *Gm5506\_v1* nucleotides. Nucleotide sequences in 5' untranslated region of *Gm5506\_v1* aligned with *Gm5506*. The underlined ATG identifies the predicted initiation codon. Gaps are show as (-).

**Supplemental Fig. S6.** Characterization of *Eno4* gene and of *Eno4* gene trap. **A)** Structure of WT *Eno4* and *Eno4* gene trap alleles. The gene trap vector (including a splice acceptor site (diagonal line box) and  $\beta$ -geo coding region integrated 300 base pair downstream of exon 1 of the *Eno4* gene. The relevant Hind 3 sites and probe positions used for Southern and Northern analysis are indicated. Probe 1 was located in the intron region downstream of the gene trap sequence; Probe 2 was located within the  $\beta$ -geo coding region. **B)** Southern analysis. DNA is isolated from testes of WT mice and of mice heterozygous (*Eno4*<sup>+/*Gt*</sup>) or homozygous (*Eno4*<sup>*Gt*/*Gt*</sup>) for the gene trap, digested with Hind 3 and hybridized with probe 1 (left panel) and probe 2 (right panel). The 1.6 and 9.0 Kb bands correspond to *Eno4* wild type and *Eno4* gene trap alleles, respectively. **C)** Northern analysis of mRNA isolated from testis of 3-month-old of WT and *Eno4*<sup>*Gt*/*Gt*</sup> mice using a [<sup>32</sup>P]-labeled mouse *Eno4* cDNA probe located in the 3' portion of the ORF. **D)** Western blotting analysis of extracts of testis from 3-month-old WT and *Eno4*<sup>*Gt*/*Gt*</sup> mice with antibodies of ENO4 (left panels) and  $\beta$ -galactosidase (right panels). The antibody to ENO4 detected a band in WT testis, but not in *Eno4*<sup>*Gt*/*Gt*</sup> testis. The antibody to  $\beta$ -galactosidase did not detect a band in WT testis, but detected a band in *Eno4*<sup>*Gt*/*Gt*</sup> testis.

**Supplemental Fig. S7.** TUNEL assay for apoptosis in testis of WT and *Eno4*<sup>*Gt*/*Gt*</sup> mice. **(A)** TUNEL staining on sections of testis from WT **(A)** and *Eno4*<sup>*Gt*/*Gt*</sup> mice **(B-D)**. TUNEL positive cells are shown as a fluorescent signal in the seminiferous tubules. Bars = 25  $\mu$ m.

**Supplemental Fig. S8.** Western blotting with sperm from WT and *Eno4<sup>Gt/Gt</sup>* mice using ENO4, pan-enolase (ENO) and AKAP4 antisera. ENO4 was detected in sperm from WT mice, but not in *Eno4<sup>Gt/Gt</sup>* mice (left upper panel). ENO was detected with antibody to pan-enolase in WT and *Eno4<sup>Gt/Gt</sup>* mice. ; the amount of ENO4 protein detected in *Eno4<sup>Gt/Gt</sup>* sperm extracts was appreciably lower than in sperm WT mice (left middle panel). AKAP4 was detected in WT and *Eno4<sup>Gt/Gt</sup>* mice; the amount of band detected with antibody to AKAP4 decreased in *Eno4<sup>Gt/Gt</sup>* mice. Antibody to  $\alpha$ -tubulin was used as a loading control.

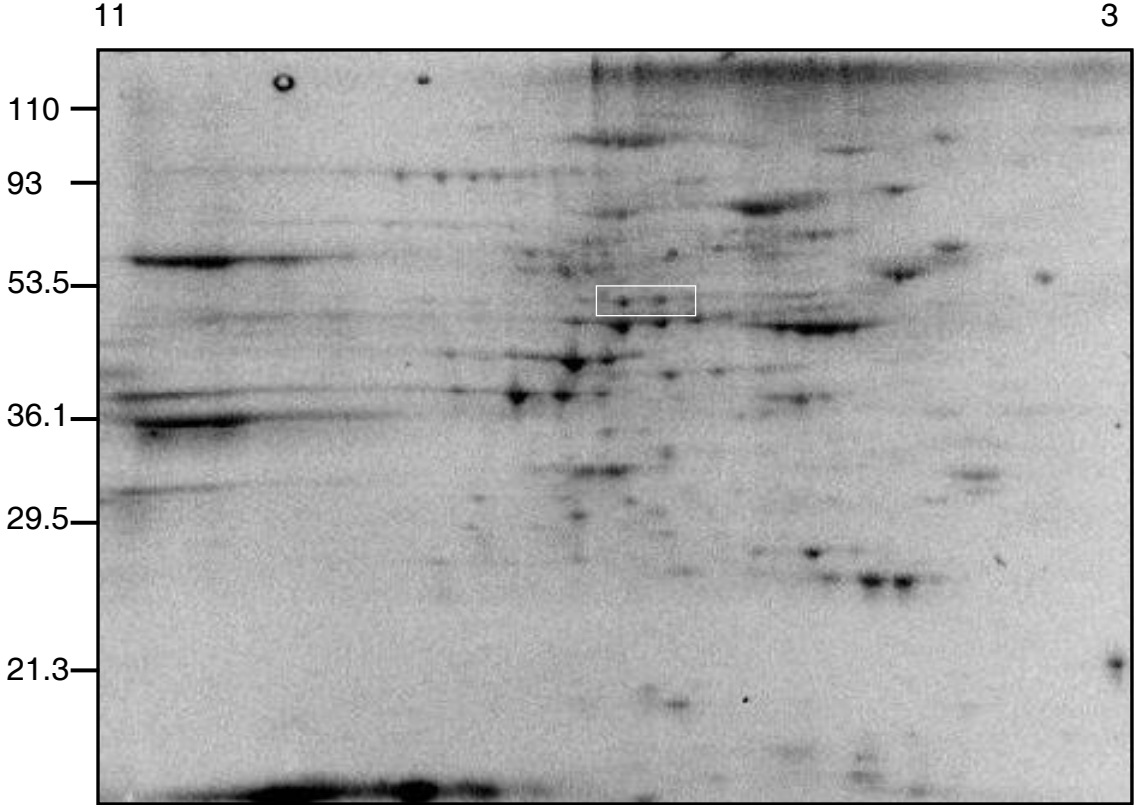



# Supplemental Fig. S2

BOR-Papers in Press. Published as DOI: 10.1095/biolreprod.112.107128

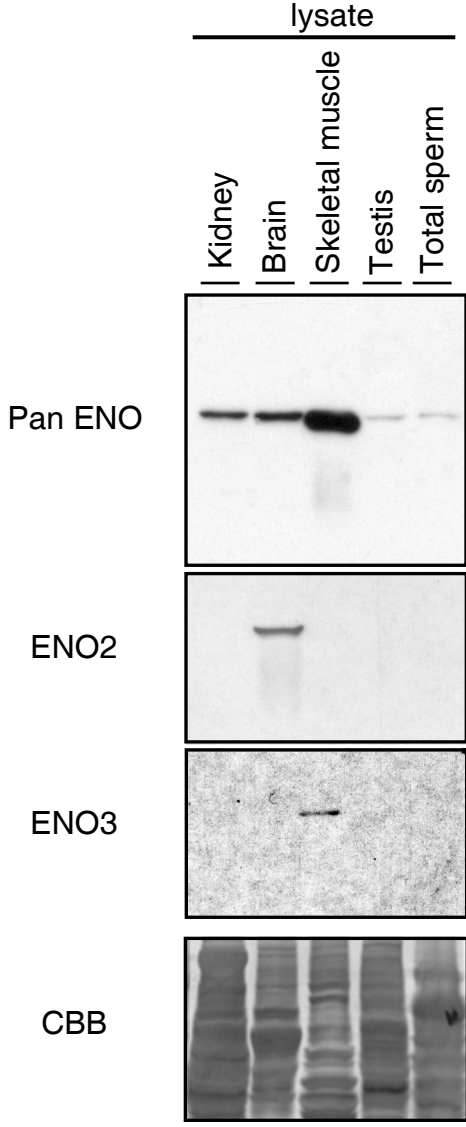

## Supplemental Fig. S3

```

ENO1      M-----
ENO2      M-----
ENO3      M-----
ENO4      MGDEDGRRGGITRDLQKLGKQAMAYYQENDVPRKLEDLLNSTFYLQPADVYGHKANYF
          *

ENO1      -----SILRIHAREIFDSRGNPTVEVDLYTA-----KGLFRAAVPSG---ASTGIYEA
ENO2      -----SIEKIWAREILDSRGNPTVEVDLYTA-----KGLFRAAVPSG---ASTGIYEA
ENO3      -----AMQKIFAREILDSRGNPTVEVDLHTA-----KGRFRAAVPSG---ASTGIYEA
ENO4      SKLAKPPSICKIVGKTIIDGLGLPTLQVEISCTIQNFPKYICAVAIPTHFVVENALPEA
          :: :* .: *:* . * **::*:: : * .*:*: . . . . : **

ENO1      LELRDNDKTRFMGKGVSQAVEHINKTIAPAL-----VSKKVNVEQEKI--DKLM
ENO2      LELRDGDKQRYLGKGVKAVDHINSRIAPAL-----ISSGISVVEQEKL--DNLM
ENO3      LELRDGDKARYLGKGVKAVEHINKTLGPAL-----LEKKLSVVDQEKV--DKFM
ENO4      LDAEDSERA----QAVNTAVQWINQSITEELWGLVPSNQAEVDHRLRTRTFEHKQVEDKER
          *: .*:*: .:* **:* ** . : * . . : . . :*: * :

ENO1      IEMDGTE-----NFSK-----F
ENO2      IELDGTE-----NFSK-----F
ENO3      IELDGTE-----NFSK-----F
ENO4      KELEKSQEELVPAPPPVTLPPPPPPPPPPPSKKGQKAGRRDTLLEKPVSPPEPPEPVLH
          *:: :: .*. *

ENO1      GANAILGVSLAVCKAGAVEKGVPLRYHIAADLAGNPE----VILPVPFNVINGGSHAGNK
ENO2      GANAILGVSLAVCKAGAAERDLPLRYHIAQLAGNSD----LILPVPFNVINGGSHAGNK
ENO3      GANAILGVSLAVCKAGAAEKGVPLRYHIAADLAGNPD----LVLPVPFNVINGGSHAGNK
ENO4      GSMAIGAVSLAVAKASATLASDPLYLTLASLKHQEQPSTFSMPLLMGSVLSGKSSPGK
          *: ** .*****.*.* . *** :*. * : : . :*: .*. * . : . *

ENO1      L-AMQEFMILPVGASSFREAMRIGAEVYHNLKNVI-----KEKYGKDAT-----
ENO2      L-AMQEFMILPVGASSFRDAMRIGAEVYHTLKGVI-----KDKYGKDAT-----
ENO3      L-AMQEFMILPVGASSFKEAMRIGAEVYHHLKGVVI-----KAKYGKDAT-----
ENO4      LHLMKEVICIPSPGLTAKQSVELLLEIQKQVNRAMETLPPPKQETKKGHNGSKRAQPPIT
          * *:*.: * . : ::::: * : : : : : : * *:::

ENO1      -NVGDEGGFAPNILENKEALELLKTAIAKAGYTDQVV--IGMDVAASEF--YRSGKYDLD
ENO2      -NVGDEGGFAPNILENSEALELVKEAIDKAGYTEKVV--IGMDVAASEF--YRDGKYDLD
ENO3      -NVGDEGGFAPNILENNEALELLKTAIAQAGYPDKVV--IGMDVAASEF--YRNGKYDLD
ENO4      GKVSHLGLCLTINYDAIEQPLLLQIGCSNLGELGVNFHLAINCAGHELMYDYSKGYEVM
          :*. . * : : * . . * * : : * : : : * . * : * . * * : :

ENO1      FKSPDDPSRYITPDQLADLYKSFVQNYNYP-VVSIEDPFDQDDWAWQKFTASAGIQ---VV
ENO2      FKSPADPSRYITGDQLGALYQDFVRNYP-VVSIEDPFDQDDWAWSKFTANVGIQ---IV
ENO3      FKSPDDPARHISGEKLGELYKNFIQNYNYP-VVSIEDPFDQDDWATWTSFLSGVDIQ---IV
ENO4      VGTHKSAA-----EMVELYVDLINKYPSIALIDPFRKEDAEQWDSLYAALASRCYLIA
          . : . . : : ** . . . . * * : : * * : * * . : : : . :

ENO1      GDDLTVTNPKRIAKAASEKSCNCLLLKVNQIGSVTESLQACKLAQSNWGMVMSHRSGET
ENO2      GDDLTVTNPKRIERAVEEKACNCLLLKVNQIGSVTEAIQACKLAQENGWGMVMSHRSGET
ENO3      GDDLTVTNPKRIAQAVEKACNCLLLKVNQIGSVTESIQACKLAQSNWGMVMSHRSGET
ENO4      GAASGSVSKLLECRNISTLKSHGLIIKHTNQTTMSDLVEITHLINGKLLAVFGSTDSSES
          * . . : . . : *:* . : : : : : : * : : . . . . . * :

ENO1      EDTFIADLVVGLCTGQIKTGAPCRSERLAKYNQILRIEELGSKAKFAGRSFRN-----
ENO2      EDTFIADLVVGLCTGQIKTGAPCRSERLAKYNQLMRIEELGDEARFAGHNFRN-----
ENO3      EDTFIADLVVGLCTGQIKTGAPCRSERLAKYNQLMRIEELGDKAVFAGRKFRN-----
ENO4      SDDSLVDLAVGFGARFIKLGGLSRGERMTKYNRLLAIEELIQRGVWGFSEEHNFSFFQE
          . * . : * . * : : * * * . * . * : : * * : : * * * . . . . : *
    
```

ENO1 -----PLAK  
ENO2 -----PSVL  
ENO3 -----PKAK  
ENO4 DATATMAEETLGLLDSIFPTEVIEESAKT

## Supplemental Fig. S4

## A

|         |                                                                        |     |
|---------|------------------------------------------------------------------------|-----|
| Eno4    | ACC <b>ATG</b> GGGAGATGAAGACGGCGGCCGCAGAGGCGGGATCACTAGGGACCTGCAGAAGCTG | 60  |
| Eno4_v1 | ACC <b>ATG</b> GGGAGATGAAGACGGCGGCCGCAGAGGCGGGATCACTAGGGACCTGCAGAAGCTG | 60  |
| Eno4_v2 | -----                                                                  |     |
| Eno4    | AAGCAGCAGGCGATGGCGTACTACCAGGAGAACGACGTCCCAGCAAGCTGGAAGATCTG            | 120 |
| Eno4_v1 | AAGCAGCAGGCGATGGCGTACTACCAGGAGAACGACGTCCCAGCAAGCTGGAAGATCTG            | 120 |
| Eno4_v2 | -----                                                                  |     |
| Eno4    | CTCAACTCCACCTTCTACCTCCAGCCTGCGGATGTCTACGGGCACCTGAAGGCAAACCTAC          | 180 |
| Eno4_v1 | CTCAACTCCACCTTCTACCTCCAGCCTGCGGATGTCTACGGGCACCTGAAGGCAAACCTAC          | 180 |
| Eno4_v2 | -----                                                                  |     |
| Eno4    | TTTTCTAAACTTGCGAAGCCTCCCTCCATATGCAAATAGTAGGGAAAACCATACTGGAT            | 240 |
| Eno4_v1 | TTTTCTAAACTTGCGAAGCCTCCCTCCATATGCAAATAGTAGGGAAAACCATACTGGAT            | 240 |
| Eno4_v2 | -----                                                                  |     |
| Eno4    | GGCCTGGGACTTCCTACTCTACAGGTGGAAATCTCCTGCACCATTCAAATTTCCCCAAG            | 300 |
| Eno4_v1 | GGCCTGGGACTTCCTACTCTACAGGTGGAAATCTCCTGCACCATTCAAATTTCCCCAAG            | 300 |
| Eno4_v2 | -----                                                                  |     |
| Eno4    | TACATCTGTGCCGTGGCGATCCCTACGCACCTTTGAAGTCGTGGAGAACGCTTTGCCAGAG          | 360 |
| Eno4_v1 | TACATCTGTGCCGTGGCGATCCCTACGCACCTTTGAAGTCGTGGAGAACGCTTTGCCAGAG          | 360 |
| Eno4_v2 | -----                                                                  |     |
| Eno4    | GCGTTGGATGCAGAGGACTCAGAAAGGGCCCAGGCCGTGAACACAGCGGTGCAGTGGATC           | 420 |
| Eno4_v1 | GCGTTGGATGCAGAGGACTCAGAAAGGGCCCAGGCCGTGAACACAGCGGTGCAGTGGATC           | 420 |
| Eno4_v2 | -----                                                                  |     |
| Eno4    | AATCAGTCCATCACAGAGGAGCTGTGGGGTCTGGTCCCCTCCAACCAGGCAGAGGTGGAC           | 480 |
| Eno4_v1 | AATCAGTCCATCACAGAGGAGCTGTGGGGTCTGGTCCCCTCCAACCAGGCAGAGGTGGAC           | 480 |
| Eno4_v2 | -----                                                                  |     |
| Eno4    | CACTGGCTCAGGACCTTCTTTGAACATAAAGTACAAGAAGATAAAGAGAGAAAAGAATTG           | 540 |
| Eno4_v1 | CACTGGCTCAGGACCTTCTTTGAACATAAAGTACAAGAAGATAAAGAGAGAAAAGAATTG           | 540 |
| Eno4_v2 | -----                                                                  |     |
| Eno4    | GAAAAGAGCCAGGAGGAGCTGGTTCCCAGCACCTCCACCAGTAACGCTGCCGCCGCCGCCG          | 600 |
| Eno4_v1 | GAAAAGAGCCAGGAGGAGCTGGTTCCCAGCACCTCCACCAGTAACGCTGCCGCCGCCGCCG          | 600 |
| Eno4_v2 | -----                                                                  |     |
| Eno4    | CCGCCGCCTCCCCACCTCCCTCCAAAAAGAAAGGGCAGAAGGCAGGACGGAGGGATACG            | 660 |
| Eno4_v1 | CCGCCGCCTCCCCACCTCCCTCCAAAAAGAAAGGGCAGAAGGCAGGACGGAGGGATACG            | 660 |
| Eno4_v2 | -----GGACGGAGGGATACG                                                   | 15  |
| Eno4    | CTTTTGGAGAAACCTGTTTCACCCCCGGAGCCCCCTGAACCAGTCCTCCATGGTAGCATG           | 720 |
| Eno4_v1 | CTTTTGGAGAAACCTGTTTCACCCCCGGAGCCCCCTGAACCAGTCCTCCATGGTAGCATG           | 720 |
| Eno4_v2 | CTTTTGGAGAAACCTGTTTCACCCCCGGAGCCCCCTGAACCAGTCCTCCATGGTAGC <b>ATG</b>   | 75  |
| Eno4    | GCCATAGGCGCTGTGTCCCTGGCAGTGGCCAAAGCCAGCGCAACCTTGGCCAGCGATCCT           | 780 |
| Eno4_v1 | GCCATAGGCGCTGTGTCCCTGGCAGTGGCCAAAGCCAGCGCAACCTTGGCCAGCGATCCT           | 780 |
| Eno4_v2 | GCCATAGGCGCTGTGTCCCTGGCAGTGGCCAAAGCCAGCGCAACCTTGGCCAGCGATCCT           | 135 |

|         |                                                               |      |
|---------|---------------------------------------------------------------|------|
| Eno4    | CTCTACTTAACCCTGGCGTCACTGAAGCATGATCAGGAGCAGCCGTCAACATTCTCTATG  | 840  |
| Eno4_v1 | CTCTACTTAACCCTGGCGTCACTGAAGCATGATCAGGAGCAGCCGTCAACATTCTCTATG  | 840  |
| Eno4_v2 | CTCTACTTAACCCTGGCGTCACTGAAGCATGATCAGGAGCAGCCGTCAACATTCTCTATG  | 195  |
| Eno4    | CCTTTGCTGATGGGATCTGTACTGAGCTGTGGGAAGTCGTCACCTGGGAAGCTACATTTA  | 900  |
| Eno4_v1 | CCTTTGCTGATGGGATCTGTACTGAGCTGTGGGAAGTCGTCACCTGGGAAGCTACATTTA  | 900  |
| Eno4_v2 | CCTTTGCTGATGGGATCTGTACTGAGCTGTGGGAAGTCGTCACCTGGGAAGCTACATTTA  | 255  |
| Eno4    | ATGAAAGAAGTGATTTGTATTCCCAGTCCTGGATTAACAGCCAAACAAAGTGTCGAGTTG  | 960  |
| Eno4_v1 | ATGAAAGAAGTGATTTGTATTCCCAGTCCTGGATTAACAGCCAAACAAAGTGTCGAGTTG  | 960  |
| Eno4_v2 | ATGAAAGAAGTGATTTGTATTCCCAGTCCTGGATTAACAGCCAAACAAAGTGTCGAGTTG  | 315  |
| Eno4    | CTTCTGGAAATTCAGAAACAAGTTAACAGAGCGATGGAGACGCTTCCACCTCCAAAACAA  | 1020 |
| Eno4_v1 | CTTCTGGAAATTCAGAAACAAGTTAACAGAGCGATGGAGACGCTTCCACCTCCAAAACAA  | 1020 |
| Eno4_v2 | CTTCTGGAAATTCAGAAACAAGTTAACAGAGCGATGGAGACGCTTCCACCTCCAAAACAA  | 375  |
| Eno4    | GAGACCAAAAAAGGGCATAATGGGAGCAAAAGAGCTCAGCCACCGATCACTGGCAAGGTA  | 1080 |
| Eno4_v1 | GAGACCAAAAAAGGGCATAATGGGAGCAAAAGAGCTCAGCCACCGATCACTGGCAAGGTA  | 1080 |
| Eno4_v2 | GAGACCAAAAAAGGGCATAATGGGAGCAAAAGAGCTCAGCCACCGATCACTGGCAAGGTA  | 435  |
| Eno4    | TCTCACCTTGGCTGTTTTAACCATCAACTACGACGCCATAGAGCAGCCACTGCTGCTGCTT | 1140 |
| Eno4_v1 | TCTCACCTTGGCTGTTTTAACCATCAACTACGACGCCATAGAGCAGCCACTGCTGCTGCTT | 1140 |
| Eno4_v2 | TCTCACCTTGGCTGTTTTAACCATCAACTACGACGCCATAGAGCAGCCACTGCTGCTGCTT | 495  |
| Eno4    | CAGGGGATCTGCTCAAACCTGGGGTTGGAAGTGGGAGTGAAGTTCCATCTAGCCATCAAC  | 1200 |
| Eno4_v1 | CAGGGGATCTGCTCAAACCTGGGGTTGGAAGTGGGAGTGAAGTTCCATCTAGCCATCAAC  | 1200 |
| Eno4_v2 | CAGGGGATCTGCTCAAACCTGGGGTTGGAAGTGGGAGTGAAGTTCCATCTAGCCATCAAC  | 555  |
| Eno4    | TGTGCTGGGCATGAGCTGATGGACTACAGTAAAGGGAAGTACGAAGTGATGGTGGGCACC  | 1260 |
| Eno4_v1 | TGTGCTGGGCATGAGCTGATGGACTACAGTAAAGGGAAGTACGAAGTGATGGTGGGCACC  | 1260 |
| Eno4_v2 | TGTGCTGGGCATGAGCTGATGGACTACAGTAAAGGGAAGTACGAAGTGATGGTGGGCACC  | 615  |
| Eno4    | CACAAAAGCGCAGCTGAGATGGTGGAGCTCTACGTGGACCTGATCAACAAGTATCCTTCC  | 1320 |
| Eno4_v1 | CACAAAAGCGCAGCTGAGATGGTGGAGCTCTACGTGGACCTGATCAACAAGTATCCTTCC  | 1320 |
| Eno4_v2 | CACAAAAGCGCAGCTGAGATGGTGGAGCTCTACGTGGACCTGATCAACAAGTATCCTTCC  | 675  |
| Eno4    | ATAATCGCCTTAATTGATCCTTTTCAGGAAGGAGGACGCCGAGCAGTGGGACAGCCTCTAT | 1380 |
| Eno4_v1 | ATAATCGCCTTAATTGATCCTTTTCAGGAAGGAGGACGCCGAGCAGTGGGACAGCCTCTAT | 1380 |
| Eno4_v2 | ATAATCGCCTTAATTGATCCTTTTCAGGAAGGAGGACGCCGAGCAGTGGGACAGCCTCTAT | 735  |
| Eno4    | GCTGCTCTGGCTTCCCGGTGCTACCTAATTGCAGGCGCCGCTTCCGGGAGTGTCTCTAAA  | 1440 |
| Eno4_v1 | GCTGCTCTGGCTTCCCGGTGCTACCTAATTGCAGGCGCCGCTTCCGGGAGTGTCTCTAAA  | 1440 |
| Eno4_v2 | GCTGCTCTGGCTTCCCGGTGCTACCTAATTGCAGGCGCCGCTTCCGGGAGTGTCTCTAAA  | 795  |
| Eno4    | CTCCTAGAGTGCAGAAATATAAGCACCCCTGAAATCCCACGGACTGATCATAAAGCACACA | 1500 |
| Eno4_v1 | CTCCTAGAGTGCAGAAATATAAGCACCCCTGAAATCCCACGGACTGATCATAAAGCACACA | 1500 |
| Eno4_v2 | CTCCTAGAGTGCAGAAATATAAGCACCCCTGAAATCCCACGGACTGATCATAAAGCACACA | 855  |
| Eno4    | AACCAAACCACAATGTCTGACTTGGTGGAAATAACCCATCTTATCAACGGTAAGAAGCTC  | 1560 |
| Eno4_v1 | AACCAAACCACAATGTCTGACTTGGTGGAAATAACCCATCTTATCAACGGTAAGAAGCTC  | 1560 |
| Eno4_v2 | AACCAAACCACAATGTCTGACTTGGTGGAAATAACCCATCTTATCAACGGTAAGAAGCTC  | 915  |
| Eno4    | CTGGCCGTCTTTGGAAGCACAGACTCGGAGTCCTCTGATGACAGCCTTGTCGATTTGGCT  | 1620 |
| Eno4_v1 | CTGGCCGTCTTTGGAAGCACAGACTCGGAGTCCTCTGATGACAGCCTTGTCGATTTGGCT  | 1616 |
| Eno4_v2 | CTGGCCGTCTTTGGAAGCACAGACTCGGAGTCCTCTGATGACAGCCTTGTCGATTTGGCT  | 975  |
| Eno4    | GTTGGATTCCGGTGCCCGGTTTATCAAGTTGGGGGTCTTTCTCGGGGTGAACGGATGACC  | 1680 |

|         |                                                                |      |
|---------|----------------------------------------------------------------|------|
| Eno4_v1 | -----                                                          |      |
| Eno4_v2 | GTTGGATTCCGGTGCCCGGTTTATCAAGTTGGGGGGTCTTTCTCGGGGTGAACGGATGACC  | 1035 |
| Eno4    | AAATACAACCGCCTTCTTGCTATAGAGGAAGAAGACTCATCCAGAGGGGAGTATGGGGTTTC | 1740 |
| Eno4_v1 | -----GGTTTC                                                    | 1622 |
| Eno4_v2 | AAATACAACCGCCTTCTTGCTATAGAGGAAGAAGACTCATCCAGAGGGGAGTATGGGGTTTC | 1095 |
| Eno4    | AGTGAAGAACACAATTTTTCTTTCTTTCAAGAGGATGCTACTGCCACAATGGCTGAGGAA   | 1800 |
| Eno4_v1 | AGTGAAGAACACAATTTTTCTTTCTTTCAAGAGGATGCTACTGCCACAATGGCTGAGGAA   | 1682 |
| Eno4_v2 | AGTGAAGAACACAATTTTTCTTTCTTTCAAGAGGATGCTACTGCCACAATGGCTGAGGAA   | 1155 |
| Eno4    | ACTCTTGGGCTCCTGGACTCCATCTTCCCCACAGAGGTGATAGAGGAATCGGCTAAAACA   | 1880 |
| Eno4_v1 | ACTCTTGGGCTCCTGGACTCCATCTTCCCCACAGAGGTGATAGAGGAATCGGCTAAAACA   | 1742 |
| Eno4_v2 | ACTCTTGGGCTCCTGGACTCCATCTTCCCCACAGAGGTGATAGAGGAATCGGCTAAAACA   | 1215 |
| Eno4    | TGA                                                            | 1883 |
| Eno4_v1 | TGA                                                            | 1745 |
| Eno4_v2 | TGA                                                            | 1218 |

**B**

|         |                                                                                         |     |
|---------|-----------------------------------------------------------------------------------------|-----|
| ENO4    | <u>M</u> GD <del>E</del> DGRRGGITRDLQKLKQQAMAYYQENDVPRKLEDLLNSTFYLQPADVYGHLANYFS        | 60  |
| ENO4_v1 | <u>M</u> GD <del>E</del> DGRRGGITRDLQKLKQQAMAYYQENDVPRKLEDLLNSTFYLQPADVYGHLANYFS        | 60  |
| ENO4_v2 | -----                                                                                   |     |
| ENO4    | KLAKPPSICKIVGKTILDGLGLPTLQVEISCTIQNFPKYICAVAIPTHFEVVENALPEAL                            | 120 |
| ENO4_v1 | KLAKPPSICKIVGKTILDGLGLPTLQVEISCTIQNFPKYICAVAIPTHFEVVENALPEAL                            | 120 |
| ENO4_v2 | -----                                                                                   |     |
| ENO4    | DAEDSERAQAVNTAVQWINQSITEELWGLVPSNQA <del>E</del> VDHRLR <del>T</del> FFEHKVQEDKERKELEK  | 180 |
| ENO4_v1 | DAEDSERAQAVNTAVQWINQSITEELWGLVPSNQA <del>E</del> VDHRLR <del>T</del> FFEHKVQEDKERKELEK  | 180 |
| ENO4_v2 | -----                                                                                   |     |
| ENO4    | SQEELVPAPPVTLPPPPPPPPPPS <del>K</del> KKGQKAGRRDTLLEKPVSPPEPPEPVLHGSM <del>A</del> I    | 240 |
| ENO4_v1 | SQEELVPAPPVTLPPPPPPPPPPS <del>K</del> KKGQKAGRRDTLLEKPVSPPEPPEPVLHGSM <del>A</del> I    | 240 |
| ENO4_v2 | -----GSM <del>A</del> I                                                                 | 5   |
| ENO4    | GAVSLAVAKASATLASDPLYLTLASLKHDQE <del>Q</del> PSTFSMPLLMGSVLS <del>C</del> GGKSSPGKLHLMK | 300 |
| ENO4_v1 | GAVSLAVAKASATLASDPLYLTLASLKHDQE <del>Q</del> PSTFSMPLLMGSVLS <del>C</del> GGKSSPGKLHLMK | 300 |
| ENO4_v2 | GAVSLAVAKASATLASDPLYLTLASLKHDQE <del>Q</del> PSTFSMPLLMGSVLS <del>C</del> GGKSSPGKLHLMK | 65  |
| ENO4    | EVICIPSPGLTAKQSVELLLEIQKQVNRAMETLPPPKQETKKGHNGSKRAQPPITGKVSH                            | 360 |
| ENO4_v1 | EVICIPSPGLTAKQSVELLLEIQKQVNRAMETLPPPKQETKKGHNGSKRAQPPITGKVSH                            | 360 |
| ENO4_v2 | EVICIPSPGLTAKQSVELLLEIQKQVNRAMETLPPPKQETKKGHNGSKRAQPPITGKVSH                            | 125 |
| ENO4    | LGCLTINYDAIEQPLLLLQGICSNLGL <del>E</del> LGVNFHLAINCAGHELMDYSKGKYEVMVGTHK               | 420 |
| ENO4_v1 | LGCLTINYDAIEQPLLLLQGICSNLGL <del>E</del> LGVNFHLAINCAGHELMDYSKGKYEVMVGTHK               | 420 |
| ENO4_v2 | LGCLTINYDAIEQPLLLLQGICSNLGL <del>E</del> LGVNFHLAINCAGHELMDYSKGKYEVMVGTHK               | 185 |
| ENO4    | SAAEMVELYVDLINKYPSIIALIDPFRKEDAEQWDSLYAALASRCYLIAGAASGSVSKLL                            | 480 |
| ENO4_v1 | SAAEMVELYVDLINKYPSIIALIDPFRKEDAEQWDSLYAALASRCYLIAGAASGSVSKLL                            | 480 |
| ENO4_v2 | SAAEMVELYVDLINKYPSIIALIDPFRKEDAEQWDSLYAALASRCYLIAGAASGSVSKLL                            | 245 |

|         |                                                              |     |
|---------|--------------------------------------------------------------|-----|
| ENO4    | ECRNISTLKSHGLIIKHTNQTTMSDLVEITHLINGKKLLAVFGSTDSESSDDSLVDLAVG | 540 |
| ENO4_v1 | ECRNISTLKSHGLIIKHTNQTTMSDLVEITHLINGKKLLAVFGSTDSESSDDSLVDLVS  | 540 |
| ENO4_v2 | ECRNISTLKSHGLIIKHTNQTTMSDLVEITHLINGKKLLAVFGSTDSESSDDSLVDLAVG | 305 |
| ENO4    | FGARFIKLGGLSRGERMTKYNRLLAIEEELIQRGVWGFSEEHNFSFFQEDATATMAEETL | 600 |
| ENO4_v1 | KNTIFLSFKRMLLPQWLRKILGSWTPSSPQR-----                         | 572 |
| ENO4_v2 | FGARFIKLGGLSRGERMTKYNRLLAIEEELIQRGVWGFSEEHNFSFFQEDATATMAEETL | 365 |
| ENO4    | GLLDSIFPTEVIEESA                                             | 618 |
| ENO4_v1 | -----                                                        | 572 |
| ENO4_v2 | GLLDSIFPTEVIEESA                                             | 388 |





# Supplemental Fig. S6

BOR-Papers in Press. Published as DOI: 10.1095/biolreprod.112.107128

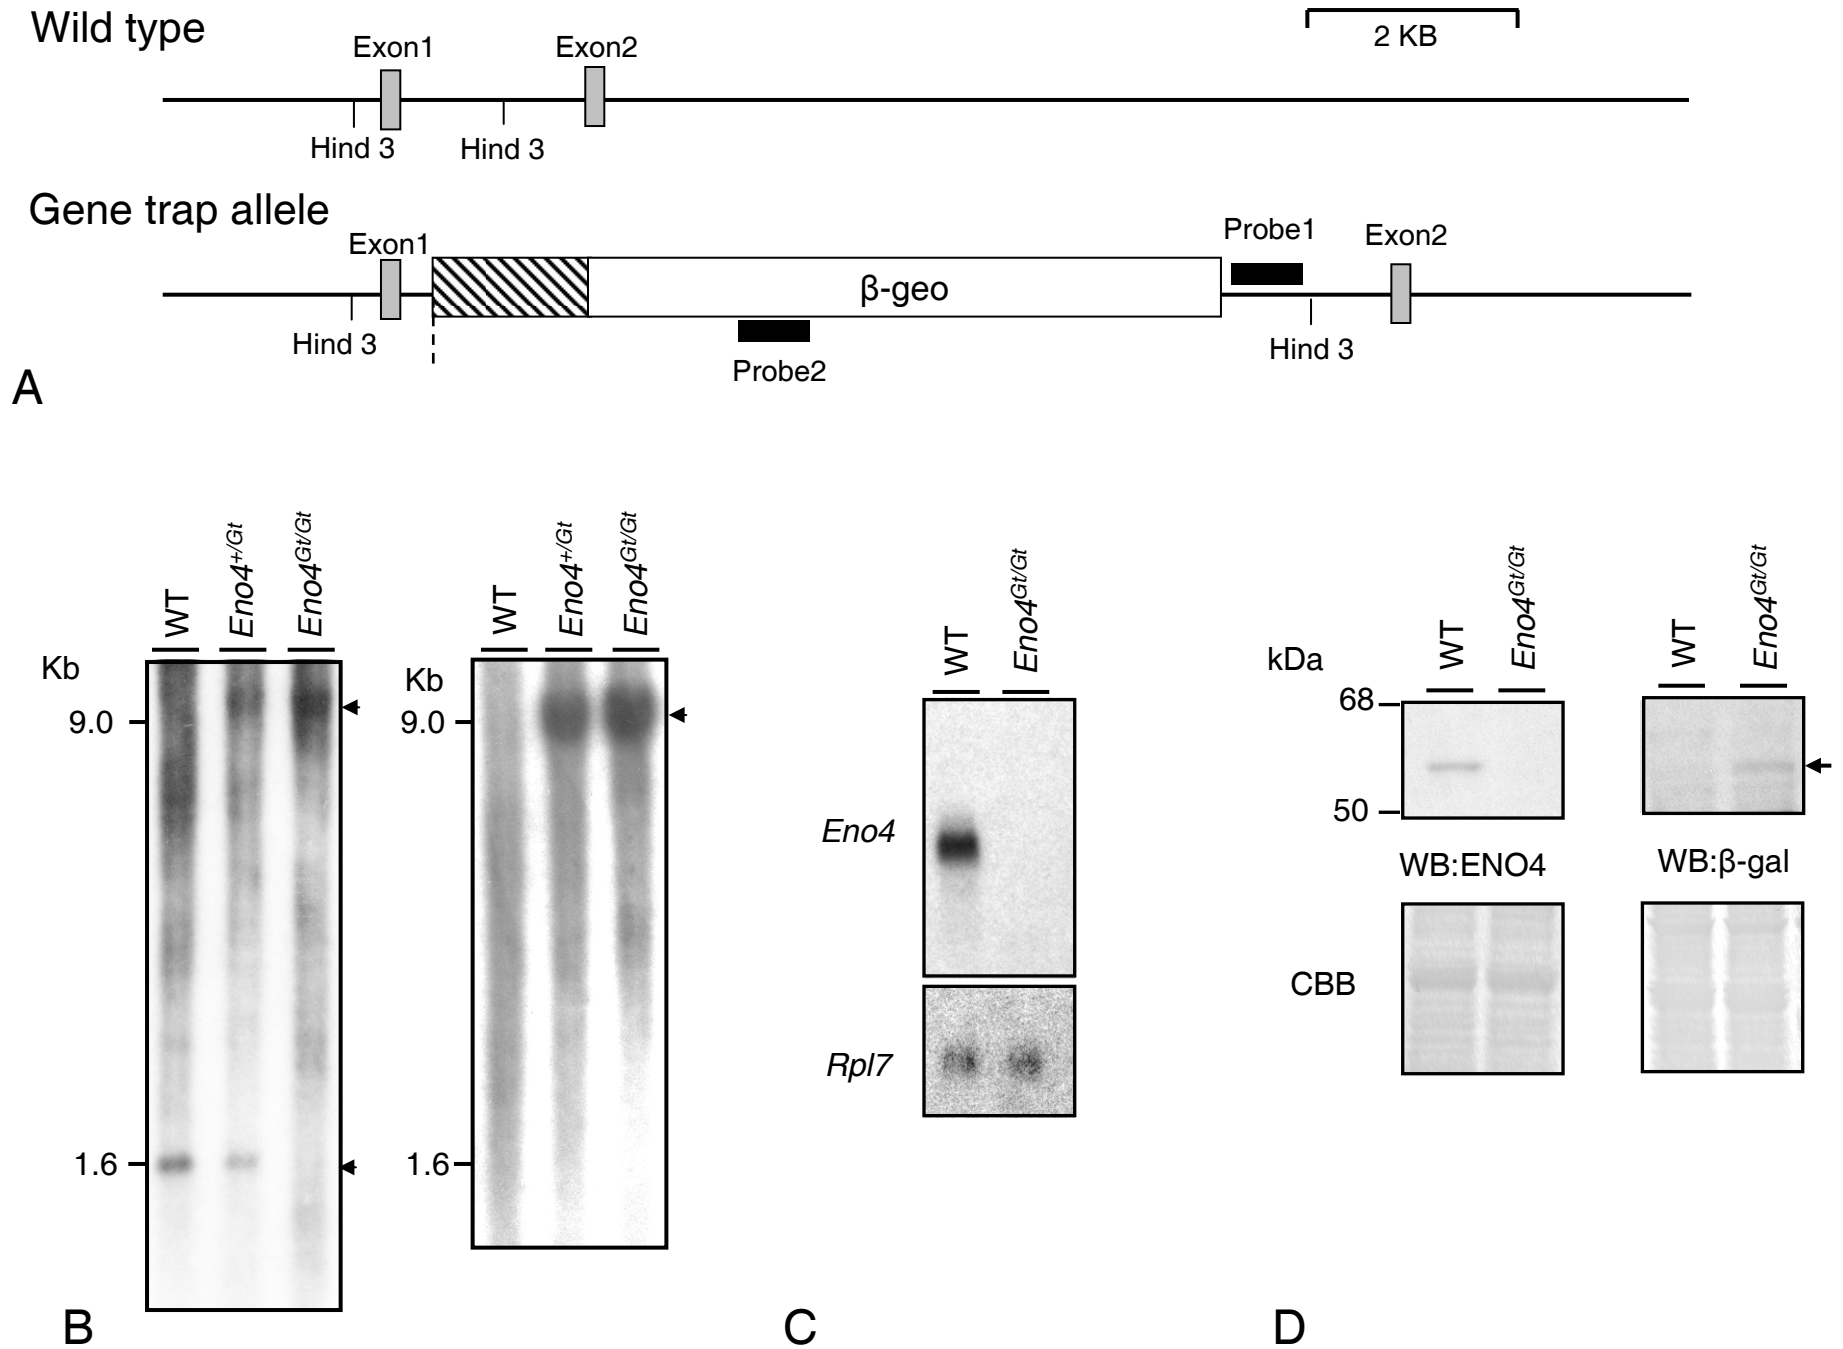

**Supplemental Fig. S7**

BOR-Papers in Press. Published as DOI: 10.1095/biolreprod.112.107128

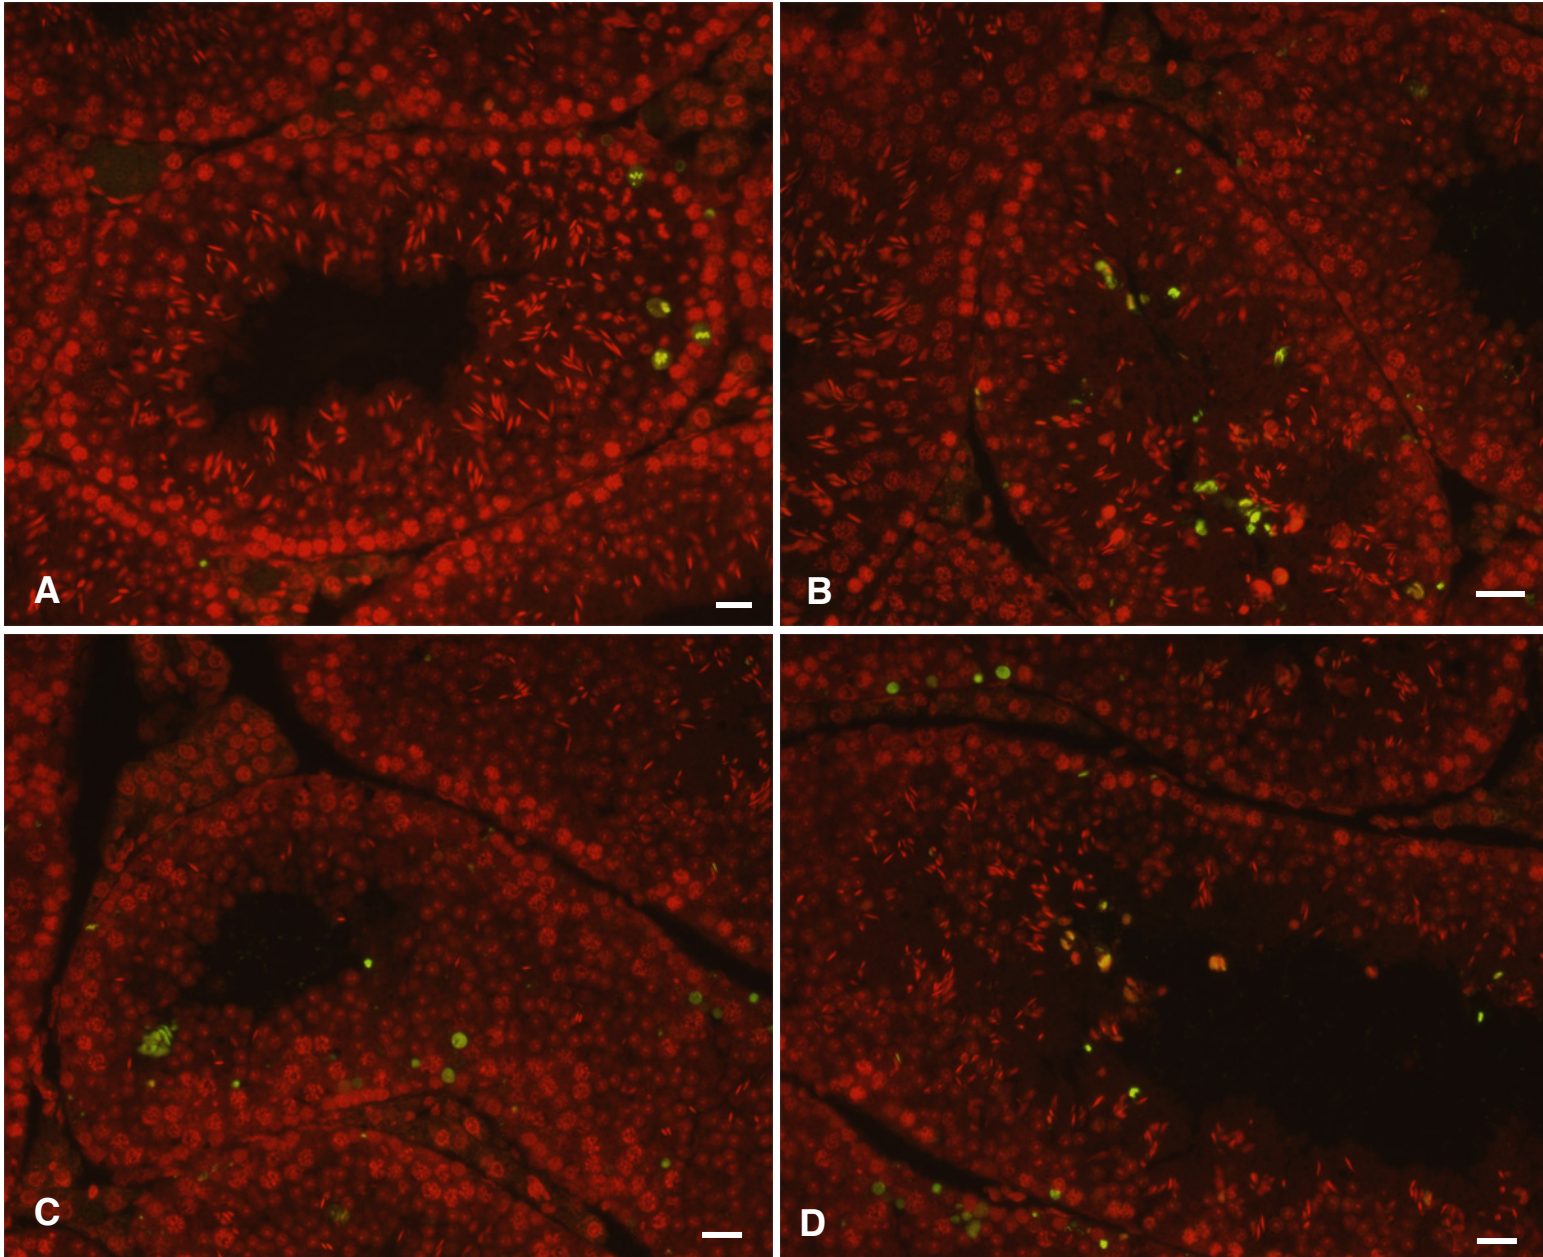

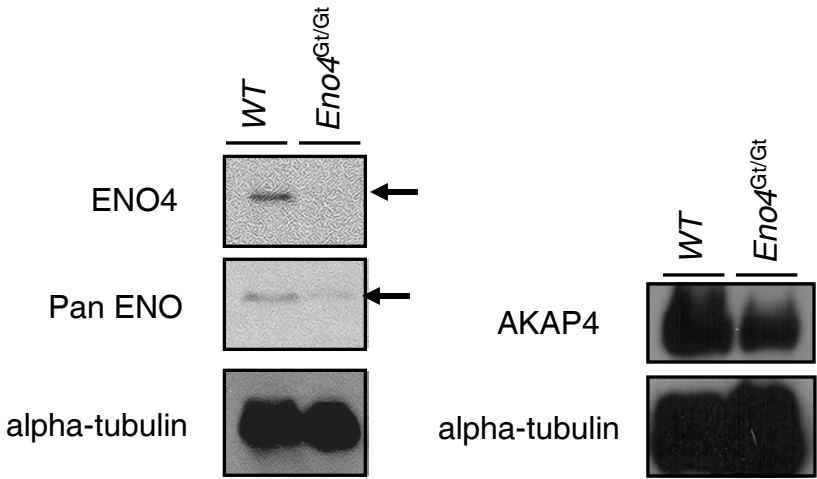

Supplement: supp_112.107128_107128SupDataV2.pdf [file supp_112.107128_107128SupDataV2.pdf]
